# Supplementary material for: Is There a Difference in Clinical Features, Microbiological Epidemiology and Effective Empiric Antimicrobial Therapy Comparing Healthcare-Associated and Community-Acquired Vertebral Osteomyelitis?
Source: MDPI journal article supplement (doi:10.3390/antibiotics10111410), 2021-11-18
Supplement: s1 [file s1]

**Table S1.** Predicted efficacy of empiric antimicrobial regimes for the CAVO and the HAVO cohort for mono- and combination therapies. Values are numeric and display the relation between the results for CAVO and HAVO cohorts. Statistically significant differences (*p*-values) are marked in bolt. S: sensitive; R: resistant; X: unknown sensitivity.

|                            | CAVO/HAVO |      |      | p            |
|----------------------------|-----------|------|------|--------------|
|                            | S         | R    | X    |              |
| <b>Mono-therapy</b>        |           |      |      |              |
| Vancomycin                 | 17/18     | 5/4  | 1/0  | 0.489        |
| Meropenem                  | 22/14     | 1/8  | 0/0  | <b>0.008</b> |
| Gentamycin                 | 16/13     | 0/5  | 7/4  | 0.809        |
| CoAmoxi                    | 21/14     | 2/7  | 0/1  | <b>0.026</b> |
| Ciprofloxacin              | 14/14     | 6/7  | 3/1  | 0.691        |
| Clindamycin                | 14/15     | 2/5  | 7/2  | 0.363        |
| Rifampicin                 | 11/13     | 0/3  | 12/6 | 0.205        |
| PipTaz                     | 22/15     | 1/7  | 0/0  | <b>0.017</b> |
| Cefazolin                  | 15/12     | 6/10 | 2/0  | 0.653        |
| Cefotaxime                 | 20/14     | 2/8  | 1/0  | 0.095        |
| Ceftriaxone                | 17/8      | 2/6  | 4/8  | <b>0.021</b> |
| Linezolid                  | 16/20     | 5/2  | 2/0  | 0.068        |
| Teicoplanin                | 17/20     | 5/2  | 1/0  | 0.132        |
| <b>Combination therapy</b> |           |      |      |              |
| Meropenem_Vancomycin       | 23/21     | 0/1  | 0/0  | 0.307        |
| Gentamicin_Vancomycin      | 22/19     | 0/3  | 1/0  | 0.311        |
| CoAmoxiclav_Vanco          | 22/19     | 1/2  | 0/1  | 0.269        |
| Vancomycin_Ciprofloxacin   | 22/19     | 1/3  | 0/0  | 0.279        |
| Gentamycin_Clindamycin     | 20/16     | 1/6  | 2/0  | 0.328        |
| Vancomycin_PipTaz          | 23/20     | 0/2  | 0/0  | 0.144        |
| Vancomycin_Cefazolin       | 17/18     | 5/4  | 1/0  | 0.489        |
| Vancomycin_Cefotaxime      | 22/20     | 1/2  | 0/0  | 0.528        |
| Vancomycin_Ceftriaxone     | 21/20     | 1/2  | 1/0  | 1.000        |
| Ciprofloxacin_Rifampicin   | 19/18     | 3/3  | 1/1  | 0.946        |
| Teicoplanin_PipTaz         | 23/22     | 0/0  | 0/0  | 1.000        |
| Linezolid_PipTaz           | 23/22     | 0/0  | 0/0  | 1.000        |
